# Supplementary material for: mTORC2 sustains thermogenesis via Akt‐induced glucose uptake and glycolysis in brown adipose tissue
Source: PubMed Central journal article supplement (PMC4772955; doi:10.15252/emmm.201505610), 2016-01-15

## Expanded View Figures

**Figure EV1. AdRiKO mice do not display alterations in body weight, plasma IGF-1 and locomotor activity.**

- A Immunoblot analysis of BAT and sWAT of AdRiKO and control mice housed at 22°C for the indicated proteins.
- B Body weight of AdRiKO and control mice housed at 22°C [ $n = 14$  (control),  $n = 12$  (AdRiKO)].
- C Body composition of AdRiKO and control mice housed at 22°C ( $n = 18$ /group).
- D Plasma IGF-1 levels in AdRiKO and control mice housed at 22°C [ $n = 11$  (control),  $n = 9$  (AdRiKO)].
- E Quantification of Akt-pS473 band intensity relative to total Akt band intensity shown in Fig 2B ( $n = 3$ /group).
- F Quantification of Akt-pS473 and mTOR-pS2481 band intensity relative to total Akt or total mTOR band intensity shown in Fig 2C ( $n = 6$ /group).
- G Immunoblot analysis of sWAT of AdRiKO and control mice housed at 22 or 4°C for 2 h for the indicated proteins ( $n = 6$ /group, each lane represents a mix of 3 mice).
- H Locomotor activity of AdRiKO and control mice housed at 22°C ( $n = 13$ /group).
- I Body temperature loss of AdRiKO and control mice upon cold exposure with *ad libitum* access to food [ $n = 11$  (control),  $n = 10$  (AdRiKO)].
- J Cold-induced shivering of AdRiKO and control mice housed at 4°C for 4 h ( $n = 6$ /group).

Data information: Data represent mean  $\pm$  SEM. Statistically significant differences between AdRiKO and control mice were determined with unpaired Student's *t*-test and indicated with asterisks (\* $P < 0.05$ ; \*\* $P < 0.01$ ; \*\*\* $P < 0.001$ ). Statistically significant differences between temperatures or treatments were determined with unpaired Student's *t*-test and are indicated with a number sign (# $P < 0.05$ ; ## $P < 0.01$ ). The exact *P*-value for each significant difference can be found in Appendix Table S2.

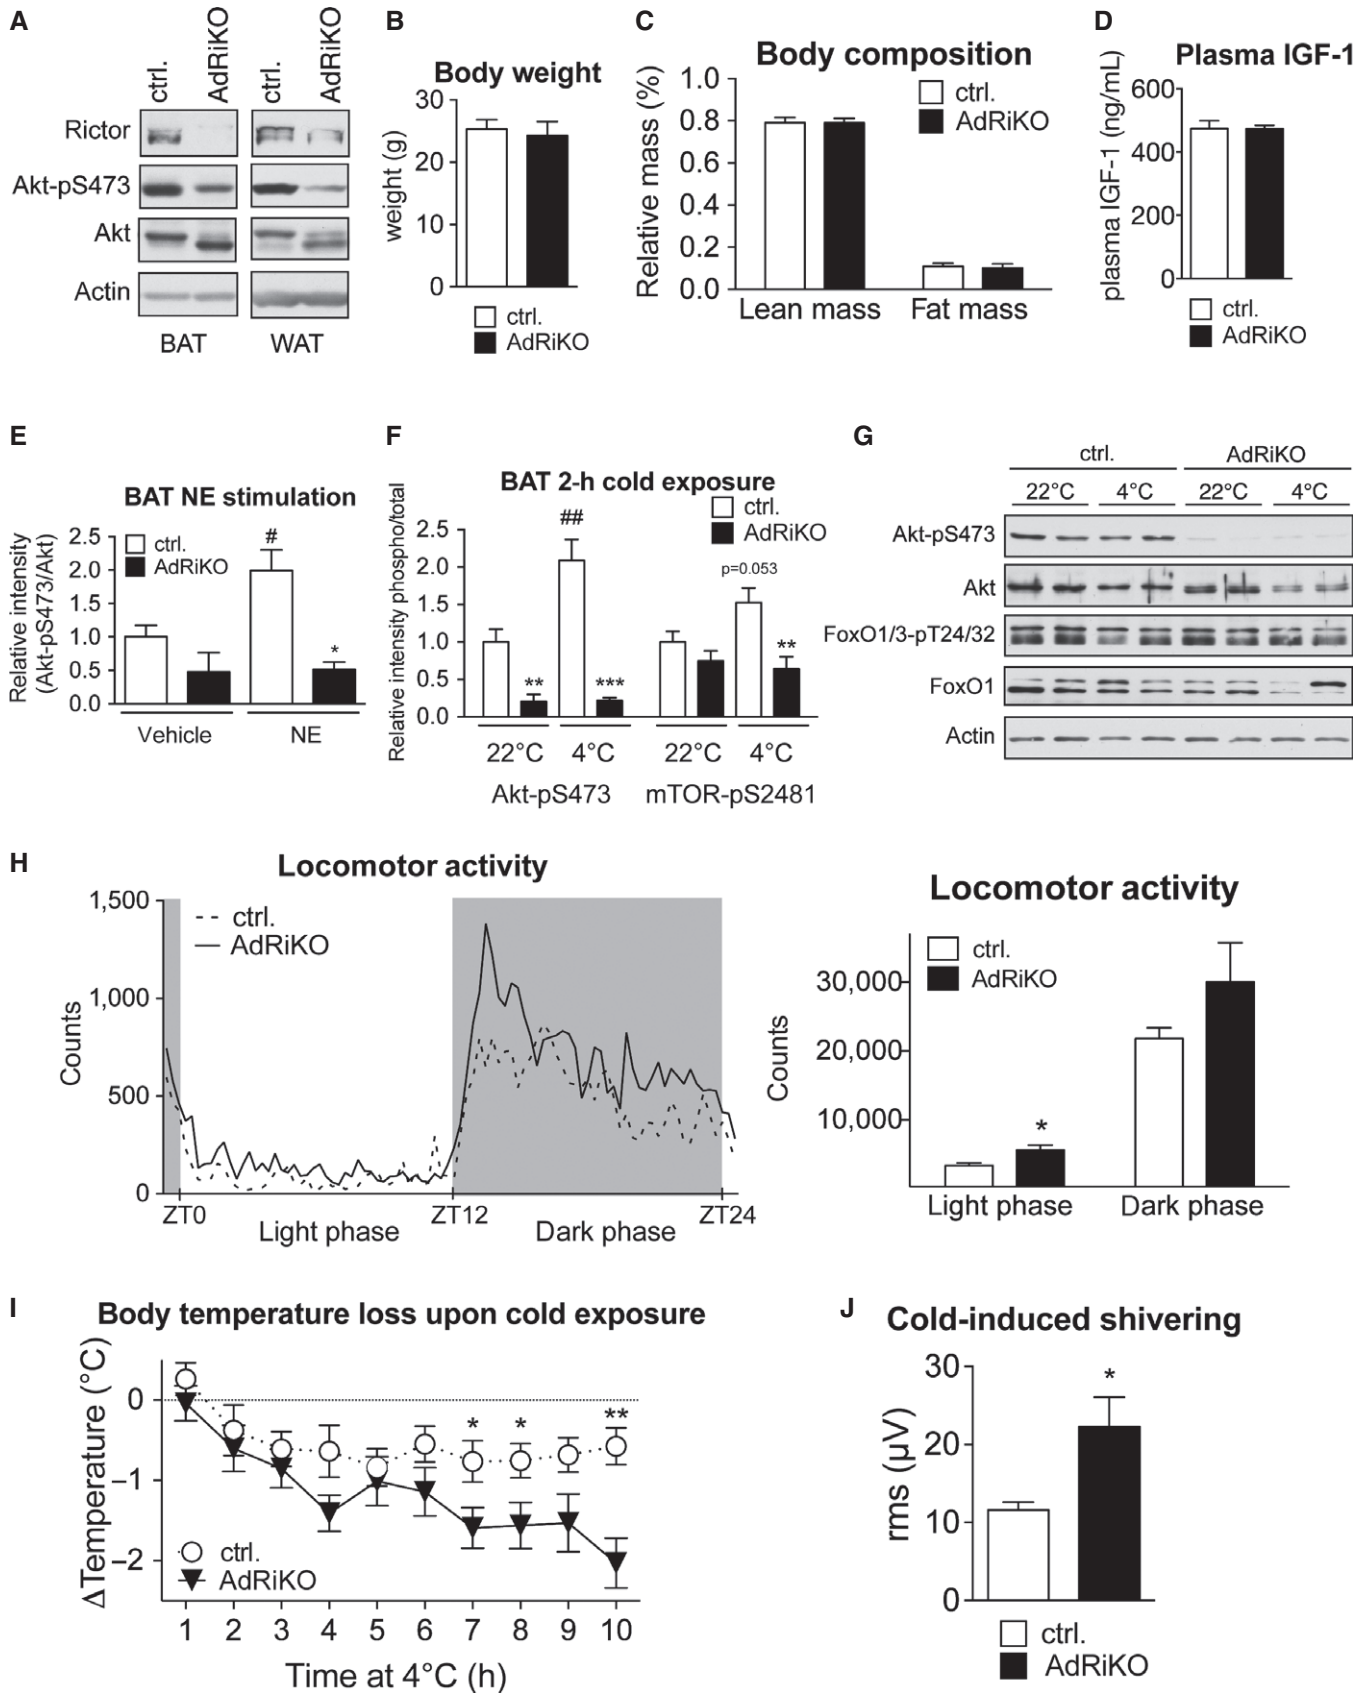

Figure EV1.

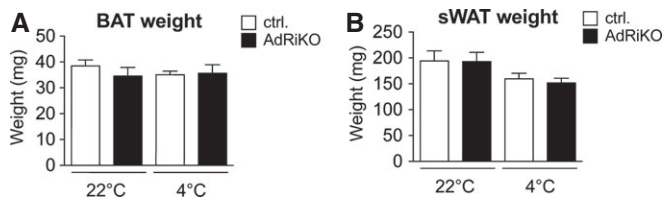

**Figure EV2. mTORC2 in adipose tissue does not affect BAT and sWAT weight.**

A BAT weight of AdRiKO and control mice housed at 22 or 4°C for 8 h ( $n = 6/\text{group}$ ). Data represent mean  $\pm$  SEM.  
 B sWAT weight of AdRiKO and control mice housed at 22 or 4°C for 8 h ( $n = 6/\text{group}$ ). Data represent mean  $\pm$  SEM.

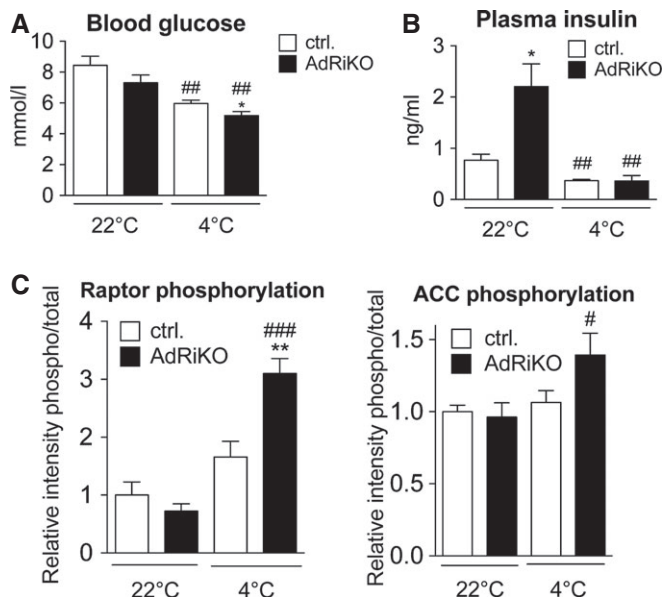

**Figure EV3. Cold exposure decreases blood glucose and circulating insulin.**

A Blood glucose of AdRiKO and control mice housed at 22 or 4°C for 8 h ( $n = 7/\text{group}$ ).  
 B Plasma insulin of AdRiKO and control mice housed at 22 or 4°C for 8 h ( $n = 6/\text{group}$ ).  
 C Quantification of raptor-pS792 and ACC-pS79 band intensity relative to total raptor or total ACC band intensity shown in Fig 5C ( $n = 6/\text{group}$ ).

Data information: Data represent mean  $\pm$  SEM. Statistically significant differences between AdRiKO and control mice were determined with unpaired Student's *t*-test and are indicated with asterisks (\* $P < 0.05$ ; \*\* $P < 0.01$ ). Statistically significant differences between temperatures were determined with unpaired Student's *t*-test and are indicated with a number sign (# $P < 0.05$ ; ## $P < 0.01$ ; ### $P < 0.001$ ). The exact *P*-value for each significant difference can be found in Appendix Table S2.

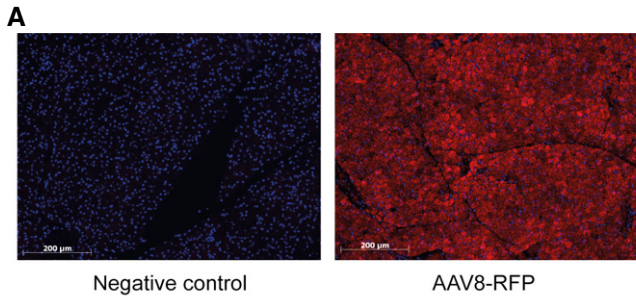

**Figure EV4. Intra-BAT injection of AAV targets genes of interest specifically to BAT.**

- A Representative immunostainings for RFP of BAT from control mice infected with either AAV8-RFP or AAV8-empty ( $n = 4/\text{group}$ ).
- B RFP mRNA expression in BAT, liver, quadriceps, and WAT of control mice infected with either AAV8-RFP or AAV8-empty ( $n = 4/\text{group}$ ).
- C Plasma insulin of AdRiKO and control mice infected with either AAV8-Akt2<sup>S474D</sup> or AAV8-empty housed at 4°C for 4 h [ $n = 7$  (control AAV8-null),  $n = 6$  (AdRiKO AAV8-null),  $n = 6$  (control AAV8-Akt<sup>S474D</sup>),  $n = 6$  (AdRiKO AAV8-Akt<sup>S474D</sup>)].

Data information: Data represent mean  $\pm$  SEM.

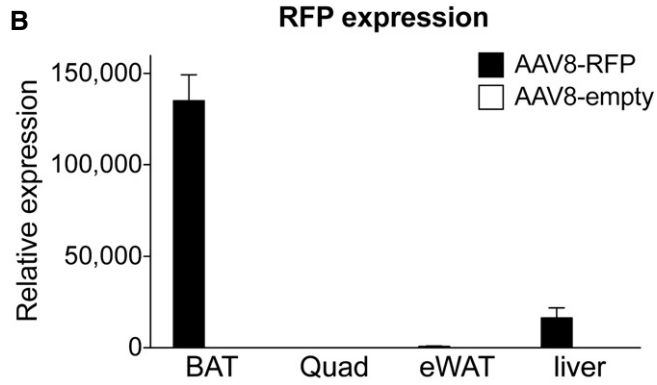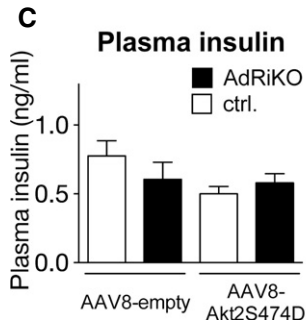

Supplement: EMMM-8-232-s002.pdf [file EMMM-8-232-s002.pdf]
