# Supplementary material for: mTORC2 sustains thermogenesis via Akt‐induced glucose uptake and glycolysis in brown adipose tissue
Source: PubMed Central journal article supplement (PMC4772955; doi:10.15252/emmm.201505610), 2016-01-15
Supplement: EMMM-8-232-s001.pdf [file EMMM-8-232-s001.pdf]

# **mTORC2 sustains thermogenesis via Akt-induced glucose uptake and glycolysis in BAT**

Verena Albert, Kristoffer Svensson, Mitsugu Shimobayashi, Marco Colombi, Sergio Muñoz, Veronica Jimenez, Christoph Handschin, Fatima Bosch, Michael N. Hall

## **Appendix**

### **Table of contents**

Appendix Table S1  
Appendix Table S2

**Appendix Table S1.** Primer sequences used for qRT-PCR

| <b>Target</b>                   | <b>forward primer (5'-3')</b> | <b>reverse primer (5'-3')</b> |
|---------------------------------|-------------------------------|-------------------------------|
| <b>CACT</b>                     | CTGCGCCCATCATTGGA             | CAGACCAAACCCAAAGAAGCA         |
| <b>CPT-1<math>\beta</math></b>  | ATCATGTATCGCCGAAACT           | CCATCTGGTAGGAGCACATGG         |
| <b>Dio2</b>                     | GAGGAAGGAAGAAGAGGAAGCAA       | TTCTTCCAGTGTTTTGGACA TGC      |
| <b>D-loop</b>                   | GGTTCTTACTTCAGGGCCATCA        | GATTAGACCCGTTACCATCGAGAT      |
| <b>HKII</b>                     | AAAACCAAGTGCAGAAGGTTGAC       | GAACCGCCTAGAAATCTCCAGAA       |
| <b>LCAD</b>                     | CCAGCTAATGCCTTACTTGGAGA       | GCAATTAAGAGCCTTTCCTGTGG       |
| <b>Ndufv1</b>                   | CTTCCCCACTGGCCTCAAG           | CCAAAACCCAGTGATCCAGC          |
| <b>PGC-1<math>\alpha</math></b> | GAGAATGAGGCAAACCTTGCTAGCG     | TGCATGGTTCTGAGTGCTAAGACC      |
| <b>RFP</b>                      | GCGGCCACTACACCTGCGAC          | TCGGCGTGCTCGTACTGCTC          |
| <b>RPL0</b>                     | CTGCTGAACATGCTGAACATCTC       | CTTCAGGGTTATAAATGCTGCCG       |
| <b>TBP</b>                      | TGCTGTTGGTGATTGTTGGT          | CTGGCTTGTGTGGGAAAGAT          |
| <b>UCP1</b>                     | TGATGAAGTCCAGACAGACAGTG       | TTATTCGTGGTCTCCAGCATAG        |

**Appendix Table S2.** p-values for statistical tests.

| Figure | p-value                                            |                                                                                                                                       |                                                                             |                                                                     |
|--------|----------------------------------------------------|---------------------------------------------------------------------------------------------------------------------------------------|-----------------------------------------------------------------------------|---------------------------------------------------------------------|
|        | control vs. AdRiKO 22°C                            | control vs. AdRiKO 4°C                                                                                                                | control 22°C vs. 4°C                                                        | AdRiKO 22°C vs. 4°C                                                 |
| 2D     | 0.00004 (***)                                      | n.d.                                                                                                                                  | n.d.                                                                        | n.d.                                                                |
| 2F     | n.d.                                               | 1h: 0.04 (*)<br>2h: 0.04 (*)<br>4h: 0.006 (**)<br>5h: 0.000003 (***)<br>6h: 0.00004 (***)<br>7h: 0.00002 (***)<br>8h: 0.0000006 (***) | n.d.                                                                        | n.d.                                                                |
| 3B     | n.s.                                               | 0.0001 (***)                                                                                                                          | 0.00000003 (###)                                                            | 0.0000004 (###)                                                     |
| 3C     | n.s.                                               | n.s.                                                                                                                                  | 0.0001 (###)                                                                | 0.00002 (###)                                                       |
| 3F     | n.s.                                               | 0.0096 (**)                                                                                                                           | 0.03 (#)                                                                    | 0.006 (##)                                                          |
| 4A     | PGC-1 $\alpha$ : 0.0008 (***)                      | n.s.                                                                                                                                  | UCP1: 0.00006 (###)<br>Dio2: 0.00007 (###)<br>PGC-1 $\alpha$ : 0.0006 (###) | UCP1: 0.04 (#)<br>Dio2: 0.0002 (###)<br>PGC-1 $\alpha$ : 0.001 (##) |
| 4C     | n.s.                                               | n.s.                                                                                                                                  | CACT: 0.04 (#)<br>LCAD: 0.0096 (##)                                         | CACT: 0.02 (#)<br>LCAD: 0.02 (#)                                    |
| 4G     | n.s.                                               | n.s.                                                                                                                                  | 0.003 (##)                                                                  | 0.0008 (###)                                                        |
| 4H     | n.s.                                               | 0.01 (*)                                                                                                                              | 0.0000002 (###)                                                             | 0.000001 (###)                                                      |
| 5A     | n.s.                                               | 0.01 (*)                                                                                                                              | 0.00001 (###)                                                               | 0.02 (#)                                                            |
| 5B     | n.s.                                               | 0.01 (*)                                                                                                                              | 0.003 (##)                                                                  | n.s.                                                                |
| 5F     | n.s.                                               | 0.02 (*)                                                                                                                              | 0.004 (##)                                                                  | n.s.                                                                |
| 5G     | n.s.                                               | n.s.                                                                                                                                  | 0.003 (##)                                                                  | n.s.                                                                |
|        | control vs. AdRiKO AAV-empty                       | control vs. AdRiKO AAV-HKII or AAV-Akt2 <sup>S474D</sup>                                                                              | control AAV-empty vs. AAV-HKII or AAV-Akt2 <sup>S474D</sup>                 | AdRiKO AAV-empty AAV-HKII or AAV-Akt2 <sup>S474D</sup>              |
| 6A     | n.s.                                               | n.s.                                                                                                                                  | 0.00000096 (###)                                                            | 0.00000004 (###)                                                    |
| 6B     | 0.005 (**)                                         | n.s.                                                                                                                                  | 0.001 (##)                                                                  | 0.01 (#)                                                            |
| 6C     | 0.02 (*)                                           | n.s.                                                                                                                                  | n.s.                                                                        | 0.01 (#)                                                            |
| 6D     | 1h: 0.00003 (a)<br>2h: 0.046 (a)<br>3h: 0.02 (a,*) | 1h: 0.03 (b)                                                                                                                          | n.s.                                                                        | 2h: 0.02 (d)<br>3h: 0.02 (d,#)                                      |
| 6F     | 0.001 (**)                                         | 0.008 (**)                                                                                                                            | n.s.                                                                        | 0.01 (#)                                                            |
| 6G     | 0h: 0.0085 (a)<br>1h: 0.004 (a)<br>3h: 0.02 (a,*)  | 1h: 0.01 (b)<br>3h: 0.03 (b,*)                                                                                                        | n.s.                                                                        | 0h: 0.01 (d)<br>3h: 0.03 (d,#)                                      |
| 6H     | 0.01 (*)                                           | n.s.                                                                                                                                  | n.s.                                                                        | n.s.                                                                |
|        | control vs. AdRiKO veh.                            | control vs. AdRiKO NE                                                                                                                 | control veh. vs. NE                                                         | AdRiKO veh. vs. NE                                                  |
| EV1E   | n.s.                                               | 0.01 (*)                                                                                                                              | 0.04 (#)                                                                    | n.s.                                                                |
|        | control vs. AdRiKO 22°C                            | control vs. AdRiKO 4°C                                                                                                                | control 22°C vs. 4°C                                                        | AdRiKO 22°C vs. 4°C                                                 |
| EV1F   | Akt-pS473: 0.002 (**)                              | Akt-pS473: 0.00006 (***)<br>mTOR-pS2481: 0.005 (**)                                                                                   | Akt-pS473: 0.008 (##)                                                       | n.s.                                                                |
| EV1H   | light phase: 0.01 (*)                              | n.d.                                                                                                                                  | n.d.                                                                        | n.d.                                                                |
| EV1I   | n.d.                                               | 7h: 0.03 (*)<br>8h: 0.03 (*)<br>10h: 0.001 (**)                                                                                       | n.d.                                                                        | n.d.                                                                |
| EV1J   | n.d.                                               | 0.02 (*)                                                                                                                              | n.d.                                                                        | n.d.                                                                |
| EV3A   | n.s.                                               | 0.04 (*)                                                                                                                              | 0.002 (##)                                                                  | 0.002 (##)                                                          |
| EV3B   | 0.01 (*)                                           | n.s.                                                                                                                                  | 0.008 (##)                                                                  | 0.002 (##)                                                          |
| EV3C   | n.s.                                               | raptor-pS792: 0.004 (**)                                                                                                              | n.s.                                                                        | raptor-pS792: 0.00009 (###)<br>ACC-pS79: 0.03 (#)                   |

n.d.=not determined, n.s.=not significant (p>0.05)
